# Supplementary material for: A Systematic Review of Compensation and Technology-Mediated Strategies to Maintain Older Adults’ Medication Adherence
Source: Int J Environ Res Public Health. 2023 Jan 1;20(1):803. doi: 10.3390/ijerph20010803 (PMC9819645; doi:10.3390/ijerph20010803)
Supplement: Supplementary file 1 [file ijerph-20-00803-s001.zip › ijerph-2078527-supplementary.pdf]

**Supplementary Table S1.** Summary of characteristics of included studies.

| No | Author       | Year | Study Design      | Country       | Strategies/ intervention                                                                                                                          | Participants | Participants Type                                                     | duration of interventions | Measurement                                                                                                                                                     | Findings                                                                                                                                                                                                                                                                                                                              |
|----|--------------|------|-------------------|---------------|---------------------------------------------------------------------------------------------------------------------------------------------------|--------------|-----------------------------------------------------------------------|---------------------------|-----------------------------------------------------------------------------------------------------------------------------------------------------------------|---------------------------------------------------------------------------------------------------------------------------------------------------------------------------------------------------------------------------------------------------------------------------------------------------------------------------------------|
| 1  | Branin et al | 2001 | Cross-Sectional   | United States | Memory strategies                                                                                                                                 | 190          | Older adults over the age of 64 living independently in the community | NE                        | The 36-Item Short-Form Health Survey (SF-36), the 15-item Geriatric Depression Scale (GDS), The Medication Taking Questionnaire, a self-administered instrument | In their medication adherence practices, older persons reported using internal memory strategies more frequently than external memory strategies. The internal memory approach most frequently used was to relate taking medication to one's daily routine. The most popular external memory strategy was using an outdated pillbox.  |
| 2  | Swanlund     | 2010 | Qualitative study | United States | Simplification, use of visual and tactile cues, and development of a medication routine, knowledge and education, mental alertness, determination | 27           | community-dwelling adults over age 74                                 | 45 to 90 minutes.         | Qualitative analysis                                                                                                                                            | The most commonly mentioned effective strategies were procedural simplification, the implementation of a medication routine, the development of tactile and visual cues, and medication awareness and education. These results can be used to assist older persons in developing effective cardiovascular drug management strategies. |

|    |              |      |              |         | n, caregiver set up                                            |              |                                                                     |                           |                                                                                                      |                                                                                                                                                                                                                                                                                                                             |
|----|--------------|------|--------------|---------|----------------------------------------------------------------|--------------|---------------------------------------------------------------------|---------------------------|------------------------------------------------------------------------------------------------------|-----------------------------------------------------------------------------------------------------------------------------------------------------------------------------------------------------------------------------------------------------------------------------------------------------------------------------|
| No | Author       | Year | Study Design | Country | Strategies/ intervention                                       | Participants | Participants Type                                                   | duration of interventions | Measurement                                                                                          | Findings                                                                                                                                                                                                                                                                                                                    |
| 3  | Harbig et al | 2012 | RCT          | Denmark | electronic reminder system called Telesvar (TS) and pill count | 168          | home-living elderly patients, taking more than four drugs per a day | 1 year                    | the adherence measured by the electronic device with the actual adherence measured by the pill count | The electronic reminder method showed a 79% adherence rate, and pill count showed a 92% adherence rate. For the purpose of revealing adherence behavior patterns, electronic monitoring devices may be helpful. When forgetfulness is the main source of the non-adherence issue, electronic reminders may also be helpful. |

| 4  | Boron et.al | 2013 | Cross-Sectional | United States | Pill caddy, association, external physical reminder, location, mental planning, physical pain, and visibility. | 354          | older adults in the Atlanta Metropolitan Area | NE                        | <p>The questionnaire (available from the authors) contained four sections: (1) General background, health, and medical product usage questions, (2) Strategies used to remember to take medical products, (3) General medication behavior questions, and (4) Attitudes about remembering medications questions.</p> | <p>The location strategy was the most frequently endorsed, with 61% responding that they used this strategy. The visibility and association strategies were endorsed by 43% and 40% of respondents, respectively. Use of a pill caddy was endorsed by 36% of the sample. Mental planning was used by 23% of respondents. Only 11% and 7% reported use of physical pain and external reminders, respectively.</p> |
|----|-------------|------|-----------------|---------------|----------------------------------------------------------------------------------------------------------------|--------------|-----------------------------------------------|---------------------------|---------------------------------------------------------------------------------------------------------------------------------------------------------------------------------------------------------------------------------------------------------------------------------------------------------------------|------------------------------------------------------------------------------------------------------------------------------------------------------------------------------------------------------------------------------------------------------------------------------------------------------------------------------------------------------------------------------------------------------------------|
| No | Author      | Year | Study Design    | Country       | Strategies/ intervention                                                                                       | Participants | Participants Type                             | duration of interventions | Measurement                                                                                                                                                                                                                                                                                                         | Findings                                                                                                                                                                                                                                                                                                                                                                                                         |

| 5  | Kinyua et. al | 2013 | Cross-Sectional | Kenya   | Send SMS, Alarm use, Alarm purpose | 500          | patients receiving Highly Active Anti-Retroviral Therapy (HAART) at the Kenyatta National Hospital Comprehensive Care Clinic in Nairobi between May and July, 2011. | NE                        | questionnaires in English or Kiswahili | The majority of HIV-infected individuals interviewed agreed that using cell phones to control their HIV infection was a nice choice. A high proportion said they needed mobile phone connectivity for medical assistance and guidance on factors that affect medication adherence, while only 3% said they needed it as a reminder to take their medications. For convenience and confidentiality, the majority favored phoning the healthcare provider with their own phones, with only 0.4% preferring to be phoned or texted by the health care provider. |
|----|---------------|------|-----------------|---------|------------------------------------|--------------|---------------------------------------------------------------------------------------------------------------------------------------------------------------------|---------------------------|----------------------------------------|--------------------------------------------------------------------------------------------------------------------------------------------------------------------------------------------------------------------------------------------------------------------------------------------------------------------------------------------------------------------------------------------------------------------------------------------------------------------------------------------------------------------------------------------------------------|
| No | Author        | Year | Study Design    | Country | Strategies/ intervention           | Participants | Participants Type                                                                                                                                                   | duration of interventions | Measurement                            | Findings                                                                                                                                                                                                                                                                                                                                                                                                                                                                                                                                                     |

| 6  | Wang et al | 2013 | RCT          | Taiwan  | A volunteer coaching program (a coach and reminders by well-trained volunteers, as well as three home visits and five telephone calls over a two-month period) | 62 (30 elderly participants were assigned to routine care plus volunteer coaching, with the remaining 32 assigned to routine care only. | community-dwelling older adults who were 65 or older and resided in a remote rural area of southern Taiwan | two months                | 22-item researcher developed structured-questionnaire (KAB-MS), based on the Medication Safety Guide. | <p>The volunteer coaching group improved overall understanding of medication safety, but there was no change in attitude at the end of the two-month study period.</p> <p>Furthermore, when compared to the normal care group, the group displayed three improved medication safety behaviors. Community health practitioners who want to improve the medication safety of chronically ill elders can use the volunteer coaching program and instructions with pictorial aids as a reference.</p> |
|----|------------|------|--------------|---------|----------------------------------------------------------------------------------------------------------------------------------------------------------------|-----------------------------------------------------------------------------------------------------------------------------------------|------------------------------------------------------------------------------------------------------------|---------------------------|-------------------------------------------------------------------------------------------------------|---------------------------------------------------------------------------------------------------------------------------------------------------------------------------------------------------------------------------------------------------------------------------------------------------------------------------------------------------------------------------------------------------------------------------------------------------------------------------------------------------|
| No | Author     | Year | Study Design | Country | Strategies/ intervention                                                                                                                                       | Participants                                                                                                                            | Participants Type                                                                                          | duration of interventions | Measurement                                                                                           | Findings                                                                                                                                                                                                                                                                                                                                                                                                                                                                                          |

|   |              |      |              |               |                                                                                                                                                                                                                                                       |     |                                                                                                     |          |                                                                                                                                                                                                                                                                               |                                                                                                                                                 |
|---|--------------|------|--------------|---------------|-------------------------------------------------------------------------------------------------------------------------------------------------------------------------------------------------------------------------------------------------------|-----|-----------------------------------------------------------------------------------------------------|----------|-------------------------------------------------------------------------------------------------------------------------------------------------------------------------------------------------------------------------------------------------------------------------------|-------------------------------------------------------------------------------------------------------------------------------------------------|
| 7 | Brooks et.al | 2014 | Mixed-Method | United States | keeping the medication in a usual location, integrating medication use with a daily routine, taking the medication at a specific time, taking the medication with other medications, using the medication only when needed, and using other reminders | 328 | English-speaking and Spanish-speaking adults ages 60 years and older with moderate or severe asthma | 3 months | the Medication Adherence Rating Scale (MARS), open-ended questioning, Brief Illness Perceptions Questionnaire, The Beliefs about Medicines Questionnaire, the Generalized Anxiety Disorder 7 questionnaire, the Short Test of Functional Health Literacy in Adults (S-TOFHLA) | The good adherence rate was greater among individuals who kept their ICS medication in the bathroom or integrated its use into a daily routine. |
|---|--------------|------|--------------|---------------|-------------------------------------------------------------------------------------------------------------------------------------------------------------------------------------------------------------------------------------------------------|-----|-----------------------------------------------------------------------------------------------------|----------|-------------------------------------------------------------------------------------------------------------------------------------------------------------------------------------------------------------------------------------------------------------------------------|-------------------------------------------------------------------------------------------------------------------------------------------------|

| 8  | Vollmer et al. | 2014 | RCT          | the Kaiser Permanente (KP) health plan—Northwest (KPNW), Hawaii (KPH), and Georgia (KPG)—United States | either usual care (UC) or 1 of 2 interventions in the form of interactive voice recognition calls—regular (IVR) or enhanced (IVR+) | 21752        | participants who were 40 years or older, had diabetes mellitus or atherosclerotic cardiovascular disease, and were suboptimally adherent. | 1 year                    | a modified version of the Proportion of Days Covered (PDC), Other EMR-Based Data | Compared to UC, both therapies significantly improved adherence to statins and ACEIs/ARBs (angiotensin-converting enzyme inhibitors/angiotensin receptor blockers). Additionally, IVR+ participants had considerably stronger ACEI/ARB adherence than IVR participants. IVR+ individuals exhibited significantly reduced low-density lipoprotein (LDL) levels at follow-up compared to UC participants among statin users. |
|----|----------------|------|--------------|--------------------------------------------------------------------------------------------------------|------------------------------------------------------------------------------------------------------------------------------------|--------------|-------------------------------------------------------------------------------------------------------------------------------------------|---------------------------|----------------------------------------------------------------------------------|----------------------------------------------------------------------------------------------------------------------------------------------------------------------------------------------------------------------------------------------------------------------------------------------------------------------------------------------------------------------------------------------------------------------------|
| No | Author         | Year | Study Design | Country                                                                                                | Strategies/ intervention                                                                                                           | Participants | Participants Type                                                                                                                         | duration of interventions | Measurement                                                                      | Findings                                                                                                                                                                                                                                                                                                                                                                                                                   |

| 9  | Goldstein et al. | 2014 | RCT          | Ohio, United States | Patients were randomized to one of four groups: smartphone silent, smartphone reminding, pillbox silent, pillbox reminding. | 60           | older adults, patient with heart failure | 10 months                 | A daily adherence value was calculated by dividing the number of recorded medication-taking events by the number of scheduled medication-taking events for all four medications. Therefore, medication adherence was measured by pillbox bin openings for people with the telehealth intervention and electronic self-report for people with the m-health intervention. | people with the telehealth device adhered 80% of the time and people with the smartphone adhered 76% of the time. medication reminding via an alarmed electronic pillbox (telehealth) or a smartphone app (m-health) produced similar medication adherence |
|----|------------------|------|--------------|---------------------|-----------------------------------------------------------------------------------------------------------------------------|--------------|------------------------------------------|---------------------------|-------------------------------------------------------------------------------------------------------------------------------------------------------------------------------------------------------------------------------------------------------------------------------------------------------------------------------------------------------------------------|------------------------------------------------------------------------------------------------------------------------------------------------------------------------------------------------------------------------------------------------------------|
| No | Author           | Year | Study Design | Country             | Strategies/ intervention                                                                                                    | Participants | Participants Type                        | duration of interventions | Measurement                                                                                                                                                                                                                                                                                                                                                             | Findings                                                                                                                                                                                                                                                   |

| 10 | Ligons et.al | 2014 | Quasi-experiment | Pittsburgh, United States | EMMA® (Electronic Medication Management Assistant), EMMA® delivers medications from single-dose blister cards, according to schedules programmed remotely by prescribing pharmacies. | 19           | The subject pool was primarily white, female, 80+ and in possession of above average education | 1 months                  | Video coding allowed for quantification of usability errors observed during the testing sessions, cognitive status was assessed using the Mini Mental State Exam (MMSE®), Functional status was assessed using the Lawton Instrumental Activities of Daily Living (IADL) questionnaire, subjective usability was assessed by completing the System Usability Scale (SUS) | By integrating reminder systems with telemedical monitoring and control capabilities, drug delivery systems like EMMA® have the potential to enhance medication management. |
|----|--------------|------|------------------|---------------------------|--------------------------------------------------------------------------------------------------------------------------------------------------------------------------------------|--------------|------------------------------------------------------------------------------------------------|---------------------------|--------------------------------------------------------------------------------------------------------------------------------------------------------------------------------------------------------------------------------------------------------------------------------------------------------------------------------------------------------------------------|-----------------------------------------------------------------------------------------------------------------------------------------------------------------------------|
| No | Author       | Year | Study Design     | Country                   | Strategies/ intervention                                                                                                                                                             | Participants | Participants Type                                                                              | duration of interventions | Measurement                                                                                                                                                                                                                                                                                                                                                              | Findings                                                                                                                                                                    |

|    |            |      |     |       |                                                                                                                                                                                                                                                                                                                                           |                                                       |                                                                       |          |                                                                                                                                                                                                                               |                                                                                                                                                                                                                                                                                                                                                                                                                  |
|----|------------|------|-----|-------|-------------------------------------------------------------------------------------------------------------------------------------------------------------------------------------------------------------------------------------------------------------------------------------------------------------------------------------------|-------------------------------------------------------|-----------------------------------------------------------------------|----------|-------------------------------------------------------------------------------------------------------------------------------------------------------------------------------------------------------------------------------|------------------------------------------------------------------------------------------------------------------------------------------------------------------------------------------------------------------------------------------------------------------------------------------------------------------------------------------------------------------------------------------------------------------|
| 11 | Mira et.al | 2014 | RCT | Spain | <p>An app for managing medications on tablets (called ALICE). In order to allow for the customization of prescriptions and medical advice, ALICE was developed for Android and iOS. In addition to alerts and multiple reminders for each alert, it displays images of each medication, both the container and the medication itself.</p> | 99 (48 and 51 in the control and experimental groups) | multimorbid patients taking multiple medications, older than 65 years | 3 months | <p>rate of missed doses and medication errors reported by patients, scores from the 4-item Morisky Medication Adherence Scale (MMAS-4), level of independence, self-perceived health status, and biochemical test results</p> | <p>Patients in the experimental group scored higher on the MMAS-4 and reported missing fewer doses of their medications. Only patients with an initial greater prevalence of medication mistakes have seen a significant reduction due to ALICE. The ALICE app boosts perceived independence in handling medications, increases adherence, and aids in lowering rates of forgetting and prescription errors.</p> |
|----|------------|------|-----|-------|-------------------------------------------------------------------------------------------------------------------------------------------------------------------------------------------------------------------------------------------------------------------------------------------------------------------------------------------|-------------------------------------------------------|-----------------------------------------------------------------------|----------|-------------------------------------------------------------------------------------------------------------------------------------------------------------------------------------------------------------------------------|------------------------------------------------------------------------------------------------------------------------------------------------------------------------------------------------------------------------------------------------------------------------------------------------------------------------------------------------------------------------------------------------------------------|

| No | Author          | Year | Study Design | Country | Strategies/<br>intervention                                                                                     | Participants | Participants Type                                                                                         | duration of interventions | Measurement                                                      | Findings                                                                                                                                                                                                                                                                                                                                                                                                                                               |
|----|-----------------|------|--------------|---------|-----------------------------------------------------------------------------------------------------------------|--------------|-----------------------------------------------------------------------------------------------------------|---------------------------|------------------------------------------------------------------|--------------------------------------------------------------------------------------------------------------------------------------------------------------------------------------------------------------------------------------------------------------------------------------------------------------------------------------------------------------------------------------------------------------------------------------------------------|
| 12 | Grindrod et. al | 2014 | Mixed-Method | Canada  | An iPad loaded with four medication management applications: MyMedRec, DrugHub, Pillboxie, and PocketPharmacist | 35           | Participants who were at least 50 years old, could read and speak English, and were taking a chronic drug | 2 hours                   | the 10 item System Usability Scale (SUS) and visual analog scale | After some time and instruction, the majority of participants felt comfortable using the applications, but their initial interactions with them left them frustrated. Although it included a medication interaction function that was one of the users' favorite features, participants preferred MyMedRec and DrugHub for their simple, linear interfaces, and it was determined that PocketPharmacist was the least usable of the four applications. |
| No | Author          | Year | Study Design | Country | Strategies/<br>intervention                                                                                     | Participants | Participants Type                                                                                         | duration of interventions | Measurement                                                      | Findings                                                                                                                                                                                                                                                                                                                                                                                                                                               |

|    |               |      |                  |               |                                                                                                |                                                                                                                             |                                                                                 |                                                                                                                                                                      |                                                                                                                                                                                                                                                                 |                                                                                                                                                                                                                                                                                                                                           |
|----|---------------|------|------------------|---------------|------------------------------------------------------------------------------------------------|-----------------------------------------------------------------------------------------------------------------------------|---------------------------------------------------------------------------------|----------------------------------------------------------------------------------------------------------------------------------------------------------------------|-----------------------------------------------------------------------------------------------------------------------------------------------------------------------------------------------------------------------------------------------------------------|-------------------------------------------------------------------------------------------------------------------------------------------------------------------------------------------------------------------------------------------------------------------------------------------------------------------------------------------|
| 13 | Stawarz et al | 2016 | Survey study     | UK and Mexico | everyday routines, physical objects used as visual cues and the location of their medications. | 971 women taking oral contraception, 88 parents of children who took antibiotics within the past year, and 87 older adults. | older adults with healthcare and social services                                | NE                                                                                                                                                                   | The first part included 18 questions that investigated how respondents remembered their medications, and how often and why they forgot. The second part included the standardized 16-item self-report Prospective and Retrospective Memory Questionnaire (PRMQ) | contextual cues, routine events, locations, and meaningful objects is a common and often effective strategy; combinations of two or more types of cues are more effective than relying on a single cue.                                                                                                                                   |
| 14 | Mertens et al | 2016 | Quasi-experiment | Germany       | The mobile application Medication Plan, installed on an Apple iPad                             | 24                                                                                                                          | Patients with coronary heart disease and no prior knowledge of tablet computers | an initial phase without assistive systems (between 3 and 6 months in line with standard rehabilitation treatment after an inpatient hospital stay), an intervention | Subjective adherence was determined by the A14-scale, Technical knowledge and experience were assessed using an adapted version of the computer literacy scale (CLS),                                                                                           | Logging data showed a significantly stronger adherence for the medication app than the paper system for both blood pressure recordings ( $P < 0.001$ ) and medication intake ( $P = 0.033$ ). A mobile app for medication adherence increased objectively and subjectively measured adherence in elderly users undergoing rehabilitation. |

|    |                 |      |                 |               |                                                                                                                      |              |                                                                                | I phase (28 days of using the app system), and a comparative phase (28 days of using a paper diary) |                                                                                                                                                                                             |                                                                                                                                                      |
|----|-----------------|------|-----------------|---------------|----------------------------------------------------------------------------------------------------------------------|--------------|--------------------------------------------------------------------------------|-----------------------------------------------------------------------------------------------------|---------------------------------------------------------------------------------------------------------------------------------------------------------------------------------------------|------------------------------------------------------------------------------------------------------------------------------------------------------|
| No | Author          | Year | Study Design    | Country       | Strategies/ intervention                                                                                             | Participants | Participants Type                                                              | duration of interventions                                                                           | Measurement                                                                                                                                                                                 | Findings                                                                                                                                             |
| 15 | Dasgupta et. al | 2016 | Cross-Sectional | United States | A comprehensive system that focuses on quality of life, eSeniorCare, includes a tablet application and a web portal. | 16           | a local independent living facility catering to a low-income senior population | 3 months                                                                                            | Medication Usage Logs (MUL), Medication Adherence Questionnaire (MAQ), Final Feedback Questionnaire (FFQ), A 12-item health survey provided by Quality Metric to measure the general health | Elderly may successfully track their medications with the help of eSeniorCare, which offers an intersection of technology and relationship-building. |
| No | Author          | Year | Study Design    | Country       | Strategies/ intervention                                                                                             | Participants | Participants Type                                                              | duration of interventions                                                                           | Measurement                                                                                                                                                                                 | Findings                                                                                                                                             |

|    |                |      |                          |                         |                                                                                                                                                             |     |                                                                                                                                                 |          |                                                                                     |                                                                                                                                                                                                                                                                                                                                                                                                                             |
|----|----------------|------|--------------------------|-------------------------|-------------------------------------------------------------------------------------------------------------------------------------------------------------|-----|-------------------------------------------------------------------------------------------------------------------------------------------------|----------|-------------------------------------------------------------------------------------|-----------------------------------------------------------------------------------------------------------------------------------------------------------------------------------------------------------------------------------------------------------------------------------------------------------------------------------------------------------------------------------------------------------------------------|
| 16 | Varleta et al. | 2017 | RCT                      | Chile                   | mobile phone short message system (SMS) text messaging, patients were randomly assigned to receive or not receive SMS related to ADA and healthy lifestyle. | 314 | patients with hypertension with <6 months of antihypertensive treatment from the Preventive Health Program of 12 different primary care centers | 6 months | self-reported four-item scale Morisky-Green-Levine questionnaire                    | By contrast, adherence improved significantly in the SMS text message group from 49% to 62.3%.                                                                                                                                                                                                                                                                                                                              |
| 17 | Tofighi et al. | 2017 | prospective cohort study | New York, United States | text message reminder                                                                                                                                       | 93  | office-based buprenorphine treatment (OBOT) patients                                                                                            | 6 months | The initial 16-item feasibility survey was based on the Technology Acceptance Model | All OBOT patients should receive reminders, according to the respondents, who also said that reminders helped patients keep their planned appointments (97% of the time). The majority of participants stated that the TM reminders helped them keep appointments (95%), that all clinic patients should be able to receive them (95%), and that they preferred getting solely TM reminders over telephone reminders (95%). |

| No | Author       | Year | Study Design | Country       | Strategies/<br>intervention            | Participants | Participants Type                                                                             | duration of interventions | Measurement                                                                                                                                                                                                                                                                                                                                                 | Findings                                                                                                                                                                                                                                                                                                                                                                                                                                    |
|----|--------------|------|--------------|---------------|----------------------------------------|--------------|-----------------------------------------------------------------------------------------------|---------------------------|-------------------------------------------------------------------------------------------------------------------------------------------------------------------------------------------------------------------------------------------------------------------------------------------------------------------------------------------------------------|---------------------------------------------------------------------------------------------------------------------------------------------------------------------------------------------------------------------------------------------------------------------------------------------------------------------------------------------------------------------------------------------------------------------------------------------|
| 18 | Pagan et. al | 2018 | Mixed-Method | United States | mobile phone text message intervention | 21           | individuals aged 50-68 years, who self-identified as African American, HIV+, currently on ART | 8 weeks                   | three-item self-report measure examining ART use in the prior 4 days, Adherence self-efficacy was assessed using the HIV Adherence Self-Efficacy Scale (HIV-ASES), a 12-item self-report scale of patients' confidence in carrying out behaviors related to treatment adherence, including taking medications in the face of barriers, qualitative analysis | <p>Participants reported statistically significant increases in medication adherence after 8 weeks, but not in their affect or self-efficacy scores.</p> <p>Qualitative findings highlight the intervention's potential for psychological support, adherence issues, and ideas for development. The study suggests that an ART adherence support text message intervention may be feasible for older African Americans living with HIV.</p> |
| No | Author       | Year | Study Design | Country       | Strategies/<br>intervention            | Participants | Participants Type                                                                             | duration of interventions | Measurement                                                                                                                                                                                                                                                                                                                                                 | Findings                                                                                                                                                                                                                                                                                                                                                                                                                                    |

| 19 | Adler et al. | 2019 | prospective cohort study | Ghana   | interventions where community-based cardiovascular disease (CVD) nurses were trained by FHI 360 | 1339         | All adult hypertensive community members, except pregnant women, were eligible for inclusion in the study. | 1 year                    | The main outcomes of interest were hypertension control (<140/90 mm Hg) and changes in SBP and DBP | 72% of patients had controlled hypertension after receiving treatment for a year. Both the systolic and diastolic blood pressures were decreased by 12.2 and 7.5 mm Hg, respectively. Education, advanced age, having controlled hypertension at enrolment, and the date of enrolment were all linked with finishing the program for 12 months. Most of the patients that persisted in the program were receiving therapy, with two thirds consuming two or more medication. |
|----|--------------|------|--------------------------|---------|-------------------------------------------------------------------------------------------------|--------------|------------------------------------------------------------------------------------------------------------|---------------------------|----------------------------------------------------------------------------------------------------|------------------------------------------------------------------------------------------------------------------------------------------------------------------------------------------------------------------------------------------------------------------------------------------------------------------------------------------------------------------------------------------------------------------------------------------------------------------------------|
| No | Author       | Year | Study Design             | Country | Strategies/ intervention                                                                        | Participants | Participants Type                                                                                          | duration of interventions | Measurement                                                                                        | Findings                                                                                                                                                                                                                                                                                                                                                                                                                                                                     |

|    |               |      |     |                 |                                                                                          |     |                                                                                                                                                                                                      |          |                                                                                                                                                                                       |                                                                                                                                                                                                                                                                                                                                                                                        |
|----|---------------|------|-----|-----------------|------------------------------------------------------------------------------------------|-----|------------------------------------------------------------------------------------------------------------------------------------------------------------------------------------------------------|----------|---------------------------------------------------------------------------------------------------------------------------------------------------------------------------------------|----------------------------------------------------------------------------------------------------------------------------------------------------------------------------------------------------------------------------------------------------------------------------------------------------------------------------------------------------------------------------------------|
| 20 | Shen et. al   | 2019 | RCT | Beijing, China  | low-cost reminder package (LCRP) combined with case-based health education or usual care | 518 | Essential hypertensive patients who volunteered to participate, aged above 18, diagnosed according to ICD-9 codes 401–401.9, and currently taking at least one kind of antihypertensive medications. | 6 months | two questionnaires on baseline and six-month follow-up                                                                                                                                | Medication adherence (MA) scores between the intervention group and the control group did not differ substantially at the beginning of the study. According to the outcomes of multilevel modeling, the intervention group's MA scores increased more than the control group's. Combining LCRP with case-based health education could greatly enhance the MA of hypertension patients. |
| 21 | HYH Siu et al | 2019 | RCT | Ontario, Canada | the eDosette intervention                                                                | 57  | community-dwelling older adults                                                                                                                                                                      | 4 weeks  | the participant's observed medication adherence rate was calculated by dividing the total medication doses taken correctly (numerator) by the total doses in the study (denominator). | The mean overall adherence rate was 82% (range 49%-100%). The eDosette intervention can be feasibly implemented into the primary care setting to provide Primary Care Teams with previously unavailable information on when an older adult takes their medications                                                                                                                     |

| No | Author      | Year | Study Design      | Country                            | Strategies/ intervention                                                                                                                                             | Participants                        | Participants Type                                                                                                                                                     | duration of interventions        | Measurement                                                                                                                         | Findings                                                                                                                                                                                                                                                                                                                                                                                                                                                            |
|----|-------------|------|-------------------|------------------------------------|----------------------------------------------------------------------------------------------------------------------------------------------------------------------|-------------------------------------|-----------------------------------------------------------------------------------------------------------------------------------------------------------------------|----------------------------------|-------------------------------------------------------------------------------------------------------------------------------------|---------------------------------------------------------------------------------------------------------------------------------------------------------------------------------------------------------------------------------------------------------------------------------------------------------------------------------------------------------------------------------------------------------------------------------------------------------------------|
| 22 | Park et. al | 2020 | Qualitative study | Northern California, United States | text messaging and mobile phone applications                                                                                                                         | 28                                  | veterans and non-veterans with a history of coronary heart disease and antiplatelet medication use                                                                    | 1-1.5 hour (3 session @ 2 weeks) | Qualitative analysis                                                                                                                | Older adults are engaged and proficient mobile technology users, perceiving TM and mobile phone apps as helpful tools in their medication adherence.                                                                                                                                                                                                                                                                                                                |
| 23 | Raj et al.  | 2020 | RCT               | India                              | the usual standard of care or the intervention that comprises of systematic education, patient diary to mark daily medicine intake and periodic telephone reminders. | 50 (25 control and 25 intervention) | older (age >60 years) inpatients of general medicine wards diagnosed with select non-communicable diseases, such as diabetes, hypertension, dyslipidemia and coronary | 6 months                         | laboratory parameters, clinical signs and symptoms, reported pill count (RPC), prescription changes, barriers to adherence, and KAP | The reported pill count (RPC) change within groups and between groups at the third and sixth months served as the main endpoints. At three months, the RPC in the control and intervention arms were 78.20% and 91.88%, respectively, while at six months, they were 68.64% and 83.08%. Similar to this, there was a statistically significant change in RPC in the intervention arm between baseline and the third month and between baseline and the sixth month. |

|    |        |      |                 |         |                             |                  |                      |                              |             |          |
|----|--------|------|-----------------|---------|-----------------------------|------------------|----------------------|------------------------------|-------------|----------|
|    |        |      |                 |         |                             |                  | artery<br>disease    |                              |             |          |
| No | Author | Year | Study<br>Design | Country | Strategies/<br>intervention | Participan<br>ts | Participants<br>Type | duration of<br>interventions | Measurement | Findings |

| 24 | Vieira et.al | 2020 | Mixed-Method | Brazil  | a monthly electronic medication organizer device equipped with an alarm clock, called Electronic System for Personal and Controlled Use of Medications (Supermed) | 32           | older adult patients with diagnosis of hypertension, who were recruited at a Primary Care Unit in Brazil. | Pre-intervention period: five meetings, Intervention day : one meeting , Post-intervention period: five meetings (one meeting per month) | Morisky Medication Adherence Scale | In terms of medication adherence, 81.2% of patients showed "lowered adherence" before the intervention and 96.9% showed "greater adherence" after it. Between intervention day and post-intervention, the mean systolic and diastolic blood pressure differences were 18.5 mmHg and 4.3 mmHg, respectively, and between pre-intervention and post-intervention, the differences were 21.6 mmHg and 4.7 mmHg, respectively. In a cohort of hypertensive older adults, the use of Supermed dramatically increased self-reported medication adherence and blood pressure control. |
|----|--------------|------|--------------|---------|-------------------------------------------------------------------------------------------------------------------------------------------------------------------|--------------|-----------------------------------------------------------------------------------------------------------|------------------------------------------------------------------------------------------------------------------------------------------|------------------------------------|--------------------------------------------------------------------------------------------------------------------------------------------------------------------------------------------------------------------------------------------------------------------------------------------------------------------------------------------------------------------------------------------------------------------------------------------------------------------------------------------------------------------------------------------------------------------------------|
| No | Author       | Year | Study Design | Country | Strategies/ intervention                                                                                                                                          | Participants | Participants Type                                                                                         | duration of interventions                                                                                                                | Measurement                        | Findings                                                                                                                                                                                                                                                                                                                                                                                                                                                                                                                                                                       |

|    |             |      |                     |        |                                                                                                                                                                                                                                                                                                                                                                                 |    |                                                                                                                                               |    |                                                                      |                                                                                                                                                                                                                                                                                                                                                                                                                    |
|----|-------------|------|---------------------|--------|---------------------------------------------------------------------------------------------------------------------------------------------------------------------------------------------------------------------------------------------------------------------------------------------------------------------------------------------------------------------------------|----|-----------------------------------------------------------------------------------------------------------------------------------------------|----|----------------------------------------------------------------------|--------------------------------------------------------------------------------------------------------------------------------------------------------------------------------------------------------------------------------------------------------------------------------------------------------------------------------------------------------------------------------------------------------------------|
| 25 | Patel et al | 2020 | mixed methods study | Canada | <p>21 electronic medication adherence products (GMSa Med-e-lert automatic pill dispenser, LiveFine automatic pill dispenser and reminder, MedReady 1700 automated medication dispenser, MedSmart med-reminder and dispensing system, e-pill MedTime Station automatic pill dispenser with tipper, TimerCap travel size, TimerCap universal size, Jones medication adherence</p> | 39 | older adults taking one or more prescription or nonprescription medications regularly, caregivers of older adults, and health care providers. | NE | the system usability scale (SUS) and NASA-task load index (NASA-TLX) | <p>Electronic medication adherence products required a mean of 12.7 steps (range 5-20) for the appropriate use and took, on average, 15.19 min to complete the setup tasks (range 1-56). Higher usability scores indicate that an older adult, caregiver, or health care provider is more likely to be able to use a product appropriately, potentially decrease medication error rates, and improve adherence</p> |
|----|-------------|------|---------------------|--------|---------------------------------------------------------------------------------------------------------------------------------------------------------------------------------------------------------------------------------------------------------------------------------------------------------------------------------------------------------------------------------|----|-----------------------------------------------------------------------------------------------------------------------------------------------|----|----------------------------------------------------------------------|--------------------------------------------------------------------------------------------------------------------------------------------------------------------------------------------------------------------------------------------------------------------------------------------------------------------------------------------------------------------------------------------------------------------|

|  |  |  |  |  |                                                                                                                                                                                                                                                                                                                                                                                                                                                                     |  |  |  |  |  |
|--|--|--|--|--|---------------------------------------------------------------------------------------------------------------------------------------------------------------------------------------------------------------------------------------------------------------------------------------------------------------------------------------------------------------------------------------------------------------------------------------------------------------------|--|--|--|--|--|
|  |  |  |  |  | system 14-<br>unit card,<br>Reizen<br>vibrating pill<br>box,<br>VitaCarry<br>advanced pill<br>case, Nishiki<br>round pill<br>box with<br>alarm,<br>MedGlider<br>system 1<br>with talking<br>reminder,<br>Patterson<br>medical<br>tabtime<br>super 8, 100-<br>Hour pill<br>reminder,<br>Med-Q smart<br>pill box, e-pill<br>MedGlider<br>home<br>medication<br>management<br>system,<br>MedCentre<br>system,<br>eNNOVEA<br>Weekly<br>Planner With<br>Advanced<br>Auto |  |  |  |  |  |
|--|--|--|--|--|---------------------------------------------------------------------------------------------------------------------------------------------------------------------------------------------------------------------------------------------------------------------------------------------------------------------------------------------------------------------------------------------------------------------------------------------------------------------|--|--|--|--|--|

|    |        |      |              |         |                                                                                                     |              |                   |                           |             |          |
|----|--------|------|--------------|---------|-----------------------------------------------------------------------------------------------------|--------------|-------------------|---------------------------|-------------|----------|
|    |        |      |              |         | Reminder, e-pill Multi-alarm pocket XL, 6 Grid pill storage case with alarm, Itzbeen pocket doctor) |              |                   |                           |             |          |
| No | Author | Year | Study Design | Country | Strategies/ intervention                                                                            | Participants | Participants Type | duration of interventions | Measurement | Findings |

|    |                    |      |                     |                 |                                                                                                                                          |     |                                                                                                                                     |           |                                                                                                                                                                                      |                                                                                                                                                                                                                                                                                                                                                                                                                                                                                                                                                                                                                 |
|----|--------------------|------|---------------------|-----------------|------------------------------------------------------------------------------------------------------------------------------------------|-----|-------------------------------------------------------------------------------------------------------------------------------------|-----------|--------------------------------------------------------------------------------------------------------------------------------------------------------------------------------------|-----------------------------------------------------------------------------------------------------------------------------------------------------------------------------------------------------------------------------------------------------------------------------------------------------------------------------------------------------------------------------------------------------------------------------------------------------------------------------------------------------------------------------------------------------------------------------------------------------------------|
| 26 | Alasfou<br>r et.al | 2020 | RCT                 | Saudi<br>Arabia | "My Dear<br>Knee"<br>application,<br>Arabic<br>smartphone<br>application<br>on<br>adherence to<br>home<br>exercise<br>programs<br>(HEPs) | 40  | women<br>aged >50<br>years with<br>knee<br>osteoarthritis                                                                           | 6 weeks   | Self-reported<br>exercise adherence<br>(The adherence rate<br>was obtained as a<br>percentage of<br>exercises<br>completed out of<br>the total number of<br>prescribed<br>exercises) | By the end of week 6, the<br>app group had reported<br>improved adherence to<br>HEPs and a significant<br>decrease in pain.                                                                                                                                                                                                                                                                                                                                                                                                                                                                                     |
| 27 | Mao<br>et.al       | 2022 | Cross-<br>Sectional | China           | the<br>intelligent<br>medication<br>administratio<br>n system and<br>The WeChat<br>Program<br>Smart Drug<br>Box                          | 354 | aged over<br>60 years,<br>diagnosed<br>with at<br>least one<br>chronic<br>disease,<br>prescribed<br>at least two<br>medication<br>s | two weeks | A self-made<br>questionnaire                                                                                                                                                         | Six options for the final<br>Kano component, which<br>was determined to be<br>indifferent, included having<br>simple and attractive<br>displays, automatically<br>blocking advertisements, a<br>user privacy protection<br>protocol, allowing logged-<br>in users to view personal<br>medical information,<br>keeping track of all<br>prescriptions, and ordering<br>medications through<br>WeChat. Researchers<br>should place more<br>emphasis on enhancing<br>older adults' experiences<br>while facilitating their usage<br>of the intelligent drug<br>administration system,<br>according to older adults' |

|  |  |  |  |  |  |  |  |  |  |                               |
|--|--|--|--|--|--|--|--|--|--|-------------------------------|
|  |  |  |  |  |  |  |  |  |  | individual needs and desires. |
|--|--|--|--|--|--|--|--|--|--|-------------------------------|

RCT: Randomized Controlled Trial; NE: Not Explicitly; SF-36: The 36-Item Short-Form Health Survey; GDS: The 15-item Geriatric Depression Scale; EMMA®: Electronic Medication Management Assistant; MMSE®: the Mini Mental State Exam; IADL: the Lawton Instrumental Activities of Daily Living; SUS: the System Usability Scale; PRMQ: the standardized 16-item self-report Prospective and Retrospective Memory Questionnaire ; SMS: Short message system; RPC :Reported Pill Count; KAP questionnaire : Knowledge, Attitude, and Practices; SBP: Systolic Blood Pressure; DBP: Diastolic Blood Pressure; ACEIs/ARBs : angiotensin-converting enzyme inhibitors/angiotensin receptor blockers.
